# Electromyographic analysis of the suprahyoid muscles in infants based on the lingual fraenum attachment during breastfeeding

## Electromyographic analysis of suprahyoid muscles during breastfeeding

Ellia Christinne de Lima França<sup>1\*¶</sup>, Lucas Carvalho Aragão Albuquerque<sup>2&</sup>, Roberta Lopes de Castro Martinelli<sup>3&</sup>, Ilda Machado Fiuza Gonçalves<sup>4&</sup>, Cejana Baiocchi Souza<sup>5¶</sup>, Maria Alves Barbosa<sup>6¶</sup>

<sup>1</sup> Graduate Programme in Health Sciences, Federal University of Goiás, Goiânia, Goiás, Brazil

<sup>2</sup> Department of Neuropsychiatry, Federal University of Pernambuco, Recife, Pernambuco, Brazil

<sup>3</sup> Dental School, University of São Paulo, Bauru, São Paulo, Brazil

<sup>4</sup> Dental School, Federal University of Goiás, Goiânia, Goiás, Brazil

<sup>5</sup> Phonoaudiology course of the Pontifical Catholic University of Goiás, Goiânia, Goiás, Brazil.

<sup>6</sup> Medical School, Graduate Programme in Health Sciences, Federal University of Goiás, Goiânia, Goiás, Brazil

\* Corresponding author

E-mail: [elliafranca@gmail.com](mailto:elliafranca@gmail.com) (ECLF)

¶ These authors contributed equally to this work

& These authors also contributed equally to this work

## Abstract

### Introduction

Muscle electrical activity analysis can aid in the identification of oral motor dysfunctions such as those resulting from altered lingual fraenum which, in turn, impairs feeding. We aimed to analyse suprahyoid muscle electrical activity of infants based on lingual fraenum attachment to the sublingual (ventral) aspect of the tongue and floor of the mouth, during breastfeeding.

### Methods and Results

We studied full-term infants of both genders aged between 1–4 months. Lingual fraenum evaluation and surface suprahyoid muscle electromyography was performed during breastfeeding. Mean muscle activities were recorded in microvolts and converted into percent values (normalisation) of the reference value. Associations between root mean square and independent variables were

tested by one-way analysis of variance and Student's t-test with significance level of 5% and test power of 95%.

We evaluated 235 infants while breastfeeding. The lingual fraenum was commonly attached to the tongue's ventral aspect between middle third and apex, and on the mouth floor visible from the lower alveolar ridge. Lower muscle activity was observed with lingual fraenum attached to apex/lower alveolar ridge, followed by attachment to middle third/lower alveolar ridge, and between middle third and apex/lower alveolar ridge. Highest activity observed in Infants with attachment to middle third/sublingual caruncles, had a thin lingual fraenum, performed several sucks followed by short pauses, showed coordination between swallowing, sucking, and breathing, did not "bite" nipple, and showed no tongue snapping nor stress.

## **Conclusion**

Greater suprahyoid muscle activity during breastfeeding was observed with lingual fraenum attachment to middle third of the tongue/sublingual caruncles, showed coordination between swallowing, sucking, and breathing. Surface electromyography is effective in diagnosing lingual fraenum alterations, whose attachment point raises doubts as restriction of tongue mobility. This technique identifies possible oral motor dysfunctions, enables direct therapeutic interventions and early intervention, and prevents feeding and communication alterations.

1  
2  
3  
4  
5  
6  
7  
8  
9  
10  
11  
12  
13  
14  
15  
16  
17  
18  
19  
20  
21  
22  
23  
24  
25  
26  
27  
28  
29  
30  
31  
32  
33  
34  
35

## Introduction

Breastfeeding is considered essential for the promotion and protection of children's health due to the nutritional and immunological properties of breast milk, which protect them from respiratory diseases, infectious [1], and diarrhea [2]. In addition, breastfeeding is considered important for the adequate development of the stomatognathic system, because the removal of breast milk involves intense muscle activity [3].

During sucking in the womb, the suprahyoid muscles (digastric, mylohyoid, geniohyoid, and stylohyoid) that effectively participate in the movement and stabilisation of the mandible and tongue movement [4,5].

The correct movement of the tongue during breastfeeding promotes an adequate fit between the infant's mouth and the mother's nipple, compressing the nipple against the hard palate and favouring the removal of the milk due to the vacuum created in the oral cavity by the raising and lowering movement of the tongue [6-9].

In the inferior surface of the tongue is located the lingual fraenum and is considered a median fold of tunica mucosa that connects the tongue to the floor of the mouth and allows the free movement of its anterior part [10].

After apoptosis, the remaining residual embryonic tissue (lingual fraenum) may limit tongue movements to varying degrees. This congenital oral anomaly is referred to as ankyloglossia [11] and may cause a reduced mouth opening, imprecision and restriction of isolated tongue movements, heart-shaped tip or downward protrusion [12], tongue resting in the floor of the mouth, and difficulties in sucking, chewing, swallowing, and speech functions, among others [11-15].

Oral dysfunctions caused by an altered lingual fraenum may compromise breastfeeding by causing discomfort and pain to mothers, ineffective emptying of the breast [11], poor weight gain, and/or early weaning [10].

Studies that evaluated the lingual fraenum by quantitative and objective methods are scarce and tried to determine whether the anatomical findings could compromise tongue movement, and consequently the oral functions [6]. Such methods enable safe diagnoses to guide therapeutical procedures for the continuity of breastfeeding.

Research on the use of surface electromyography (EMG), which is a method for recording variations in muscle electrical activity during contraction [16,17], are also scarce, especially those evaluating the sucking function in infants [5,18-26]. EMG is considered an easy, fast, low-cost, safe, and non-invasive procedure that

36 can provide important information about muscle functions [5,16-18,23-26], which  
37 can be used to diagnose oral-motor dysfunction accurately [23,24].

38 Some studies have evaluated the activity of orofacial muscles using surface  
39 electromyography during breastfeeding and other feeding methods [5,18-24,26]  
40 but, to the best of our knowledge, no study analysed the activity of the suprahyoid  
41 muscles in newborns and infants during the sucking function in breastfeeding  
42 based on the lingual fraenum attachment.

43 We decided to analyse the suprahyoid muscles (digastric, mylohyoid,  
44 geniohyoid, and stylohyoid), because they directly participate in the sucking  
45 function, act in mandible movement and stabilisation, and participate in tongue  
46 movement, and, because of their location, makes it possible to attach the electrodes  
47 [5].

48 There is still no established pattern for the electrical activity of the suprahyoid  
49 muscles involved in the sucking function in infants based on the lingual fraenum  
50 attachment to the tongue and the floor of the mouth. In this context, we note the  
51 importance of in-depth studies on the subject that may favour the understanding of  
52 muscle activity, and aid in the identification of possible oral motor dysfunctions  
53 and feeding efficiency. These studies may also contribute to the planning and  
54 implementation of actions in health services that would enable breastfeeding and  
55 minimise the impact and consequences related to early weaning, which would  
56 benefit child development.

57 The present study's aim was to analyse the electrical activity of the suprahyoid  
58 muscles in infants, based on the lingual fraenum attachment to the tongue and the  
59 floor of the mouth, during the sucking function in breastfeeding.

## 60 **Materials and Methods**

### 61 **Study Design**

62 This is an observational, analytical, cross-sectional study. The Research Ethics  
63 Committee approved the study under number 705.229 on June 30, 2014. This study  
64 was conducted at a University in the central region of Brazil. All adults responsible  
65 for the infants participating in this study received and signed an Informed Consent  
66 Form and a Consent Form for the Participation of the Person as a Subject,  
67 respecting Resolution 466/2012.

### 68 **Participants**

69 Infants of both genders aged between 1 and 4 months had their lingual  
70 fraenum evaluated from March 2015 to December 2016. Infants with anatomical

71 and physiological changes on the face, pre-term and post-term neurological  
72 impairment, weight below 2500 g, or exclusively bottle-fed were excluded.

## 73 **Procedures**

74 The independent variables analysed were: age in days at the examination, gender,  
75 clinical history (CH), lingual fraenulum (visualisation is possible, visualisation is  
76 not possible, or visualisation is only possible with manoeuvre), lingual fraenulum  
77 thickness (thin or thick), lingual fraenulum attachment to the tongue (middle third,  
78 between the middle third and the apex, or at the apex) and the floor of the mouth  
79 (visible from the sublingual caruncle or lower alveolar ridge), non-nutritive  
80 sucking pattern – NNS (adequate: forward positioning of the tongue, coordinated  
81 movements and efficient sucking, inadequate: limited forward positioning of the  
82 tongue, uncoordinated movements and delayed onset of sucking) and nutritive  
83 sucking - NS (rhythm: several sucks followed by short pauses or few sucks  
84 followed by long pauses); coordination: adequate - balance between food  
85 efficiency and sucking functions, swallowing and breathing, no signs of stress or  
86 inadequate - cough, choking, dyspnoea, regurgitation, hiccups, swallowing noises;  
87 “Bites” the nipple: yes or no; tongue snapping during sucking: yes or no).

88 The dependant variable analysed was muscle electrical activity (MEA) defined  
89 by the mean of the potential action of the motor units of a muscle group, obtained  
90 from the electromyographic signal, and expressed in root meant square (RMS) in  
91 microvolts ( $\mu\text{V}$ ) and later converted to percentage (%).

92 We used the “Protocol for evaluation of lingual fraenulum in infants” proposed  
93 by Martinelli [27] for the quantitative evaluation of lingual fraenulum.

94 The parents were advised at the time of the examination not to feed the babies  
95 for at least two hours before the evaluation.

96 The first stage of the protocol was the data collection of the clinical history,  
97 including the following items: date of the examination, full name, gender, birth  
98 date, age, address, telephone number, parents’ name, family members with lingual  
99 fraenulum alterations, data on the infant’s current general health, time between  
100 feedings, data on whether the infant gets tired while sucking, and data on whether  
101 the infant progressively releases the nipple or bites the nipple.

102 The second stage of the protocol included an anatomical and functional  
103 evaluation to observe the general aspects of the lingual fraenulum, a nutritive  
104 sucking evaluation during breastfeeding, to investigate tongue movements and  
105 positioning in the oral cavity, through electromyographic.

106                    During the anatomical and functional evaluation, we observed the posture of the  
107 lips at rest (closed, semi-open, or open), the tendency of tongue positioning during  
108 crying (raised, midline, midline with lateral elevation, or downward tongue tip with  
109 lateral elevation), and the shape of the tip of the tongue when raised during crying  
110 or a lifting manoeuvre (rounded, slight crevice at apex, or heart-shaped). Through  
111 the elevation of the lateral margins of the tongue by the gloved right and left index  
112 fingers of the evaluator, it was observed whether lingual fraenum could be  
113 visualised or not and if it was necessary to visualised with specific manoeuvre. If  
114 the lingual fraenum could be visualized, we determined: whether it was thin or  
115 thick; whether the lingual fraenum was attached to the middle third of the tongue,  
116 between the middle third and the apex, or to the apex; and whether the attachment  
117 to the floor of the mouth was visible from the sublingual caruncles (opening of the  
118 ducts of the right and left submandibular glands) or from the lower alveolar ridge.

119                    The non-nutritive sucking was evaluated by introducing the gloved minimum  
120 finger into the baby's mouth during sucking for 2 minutes, and tongue movement  
121 was observed (adequate: tongue anterioration, coordinated movements and  
122 efficient suctioning; inadequate: limited tongue anterioration, uncoordinated  
123 movements and delayed onset of suction).

124                    The evaluation of nutritive sucking was made along with surface  
125 electromyography. We observed: the sucking rhythm (counting the number of  
126 sucks in three sucking groups, which were separated by pause time, and then taking  
127 the mean); pause time (considering the duration of the pauses between three  
128 sucking groups, and then taking the mean); coordination between  
129 sucking/swallowing/breathing and classified into adequate or inadequate; and  
130 whether the infant bit the nipple and whether the infant had tongue snapping during  
131 nutritional sucking.

132                    Evaluation of the electrical activity of the suprahyoid muscles (MEA) included all  
133 infants and was performed during sucking of the mother's breast. We used the  
134 MIOTOOL 200 device (manufactured by Miotec Equipamentos Biomédicos Ltda.  
135 - ME, Porto Alegre, Brazil) that was comprised of four channels, had a 7.2 V 1.700  
136 Ma NiMH rechargeable battery, was operated in isolation from the utility system,  
137 and was connected to a Sony Vaio® notebook. The electromyographic signal was  
138 processed through a data acquisition system that allowed for the selection of 8  
139 independent gains per channel, which was used to a gain of 1000; a low pass filter  
140 of 20 Hz; a high pass filter of 500 Hz; two SDS500 sensors connected to clamp  
141 sensors; a reference cable (earth); and a calibrator (MIOTEC®) were used.

142 The records were made in a quiet place with natural light and ambient  
143 temperature [28]. We used disposable unipolar surface electrodes (Meditrace®,  
144 Infant Model, manufactured by Tyco/Kendall-USA, imported by Lamedid  
145 Comercial e Serviços Ltda, Barueri - SP - Brazil São Paulo, Brazil) with a material  
146 made of silver-silver chloride (Ag-AgCl), adhesive, and conductive solid gel  
147 (hydrogel) that were responsible for capturing and conducting the signal of the  
148 EMG. Subsequently, the skin was cleaned with gauze soaked in 70° alcohol to  
149 remove oil or any material that interfered with the signal capture [29,30].

150 The electrode positioning followed a standard procedure that started with the  
151 reference electrode or “earth”, followed by the attachment of the electrodes to the  
152 suprahyoid muscles. The reference electrode, which was placed in the frontal bone  
153 (forehead), minimises interferences from external electrical noises [17,29].

154 The other electrodes were placed in a bipolar configuration in the suprahyoid  
155 muscles with a minimum distance of 10 mm between them [30]. The evaluator  
156 stimulated non-nutritive sucking by introducing a flavoured (milk breast) finger for  
157 five seconds to locate this region and, by this manoeuvre, it was possible to palpate  
158 the muscles.

159 After attaching the electrodes to the skin of the infant, the clamp sensors were  
160 placed following the same order as the electrode attachment [17,29]. After  
161 completing this procedure, the configuration, channel enablement in the software,  
162 and subsequent calibration were performed. The three unused channels were  
163 disabled.

164 The mother was seated comfortably in a chair with back support with her baby  
165 on her lap. Before the evaluation, she received the necessary guidelines on the  
166 clinical examination, evaluation of nutritive sucking, and electromyographic  
167 examination.

168 The mother received instructions about her positioning: seated with feet on the  
169 ground; and about the positioning of the infant: supported and aligned with the  
170 head and the spine straight, belly facing the body of the mother, face towards the  
171 mother’s breast, and mouth towards the areola and nipple to catch the breast.

172 Subsequently, the activity of the suprahyoid muscles during breastfeeding was  
173 recorded for 3 minutes (Fig 1).

174 **Figure 1 – Electromyographic evaluation.** Electrodes attached to bone (forehead)  
175 and submandibular (suprahyoid muscles) regions during sucking in breastfeeding

176 The infants whose results showed interference of the lingual fraenum in the  
177 tongue movements and/or with reduced activity of the suprahyoid muscles were  
178 referred to basic health units with a speech-language pathology report of the lingual



179 fraenum. After scheduling a consultation with the paediatrician, the infant was  
180 referred to the paediatric dentistry service for assessment and definition of conduct.  
181 The data collected in this study were archived in a confidential location and will  
182 be incinerated after 5 years.

## 183 **Electromyographic analysis**

184 The Miograph 2.0 (MIOTEC<sup>®</sup>, São Paulo, Brazil) software was used for  
185 presenting and interpreting the electromyographic signal. The numerical data was  
186 expressed in *root mean square* (RMS), which represents the square root result of  
187 the mean square of the instantaneous amplitudes of the signal of the recorded  
188 electromyographic trace whose unit is expressed in microvolts ( $\mu\text{V}$ ).

189 In order to select the best signals, the best configurations that presented the least  
190 noise and the most symmetrical and connected histogram to the signal were  
191 considered.

192 The means recorded in  $\mu\text{V}$  were transformed into percent values of the  
193 reference value (normalisation by the maximum peak) for each subject. The  
194 formula for calculating the percentage, according to the recommendations of the  
195 International Society of Electrophysiology and Kinesiology (ISEK) [30], was  
196  $(X/Y) \times 100$  where X = MEA (muscular electrical activity) mean in the requested  
197 task ( $\mu\text{V}$ ) and Y = reference value corresponding to the mean of the MEA in PICO  
198 ( $\mu\text{V}$ ). Thus, the highest value of the electromyographic signal of the suprahyoid  
199 muscles was identified for 3 seconds of breastfeeding. The maximum peak was  
200 considered 100% of activity and the mean activity during 3 seconds of the  
201 breastfeeding was considered “X” [17,29,31].

202 The normalisation technique is essential so that the surface electromyography  
203 signal can be compared in different studies, muscles, and participants after being  
204 analysed. This technique is considered a prerequisite for any comparative analysis  
205 of EMG signals [28,31].

## 206 **Statistical analysis**

207 The data were entered into IBM SPSS Statistics v. 23 (IBM, Inc, Chicago, Illinois,  
208 USA) and subjected to a descriptive, inferential, and analytical statistical analysis  
209 using frequencies, central tendency, and dispersion measure. A test power of 95%  
210 was used, and type 1 error was set at 5%.

211 The muscular electrical activity found in RMS corresponded to the dependant  
212 variable, which had a normal distribution (Kolmogorov-Smirnov  $p = 0.113$ ),  
213 considering both groups. The independent variables were: age in days at the  
214 electromyographic examination, gender, feeding type, lingual fraenum



215 attachment type, and nutritive sucking pattern. The association between the  
216 dependant variable RMS and the independent variable age was tested by a one-  
217 factor Analysis of Variance (ANOVA), which allows for the comparison of  
218 continuous variables at a single time. The association between the dependant  
219 variable RMS and other independent variables was tested by the Student's t-test,  
220 which allows for the comparison of two samples using their means for statistical  
221 inference.

## 222 **Results**

223 Two hundred fifty-one infants that met the inclusion criteria underwent surface  
224 electromyography between February 2015 to November 2016. Eleven infants were  
225 excluded because their records showed an electromyographic signal with  
226 interference, and four infants were excluded due to a failure in the capture and  
227 recording of the electromyographic signal at the time of evaluation that resulted in  
228 a final sample size of 235 infants.

229 The highest age range at the day of the examination was 31 to 60 days,  
230 corresponding to 37.0% (n = 87) of the infants, and was followed by 61 to 90 days,  
231 corresponding to 26.8% (n = 63) of the infants. Only 5.1% (n = 12) of the infants  
232 were aged between 121 and 149 days.

233 Most of the infants were female, corresponding to 51.9% (n = 122) of the total  
234 sample, and 48.1% (n = 113) were male.

235 Exclusive breastfeeding was the feeding type most used, corresponding to 176  
236 infants (74.9%), and was followed by breastfeeding/bottle, corresponding to 59  
237 babies (25.1%). The justifications reported by the mothers were the child crying a  
238 lot, irritation, being hungry, weak, insufficient breast milk and not breastfeeding  
239 gain weight. All of the infants were assessed by surface electromyography during  
240 sucking of the maternal breast.

241 Of the 235 infants evaluated, 197 (83.8%) did not have complaints of difficulties in  
242 breastfeeding in their clinical history; 172 (73.1%) had a lingual fraenum that  
243 could be visualised without manoeuvre; in 63 (27.3%) of the infants presented  
244 lingual frenulum covered by a mucosal curtain, being necessary maneuver to  
245 visualize it; 215 (91.4%) had a thin lingual fraenum and 20 (9.3%) thick lingual  
246 fraenum. The infants were divided into six groups according to the location of the  
247 fraenum attachment on the tongue and floor of the mouth: 53 (22.5%) had the  
248 lingual fraenum attached of the middle third on the tongue and visible from the  
249 sublingual caruncles (group 1); 35 (14.8%) had the lingual fraenum attached to  
250 the middle third/lower alveolar ridge (group 2); 28 (11.9%) had attached between

251 the middle third and apex, and visible from the sublingual caruncles (group 3); 102  
 252 (43.4%) had the fraenum attached between the middle third and the apex and  
 253 visible from the lower alveolar ridge (group 4); 17 (7.2%) had the fraenum  
 254 attached to the apex and visible from the lower alveolar ridge (group 5); and no  
 255 infants with the lingual fraenum attached in the apex on the tongue and visible  
 256 from the caruncles were identified (group 6).

257 Of the 235 infants evaluated, 146 (62,1%) presented adequate nutritive sucking.

258 For the statistical analysis associating the dependant variable of muscular  
 259 electrical activity value with the other variables, were excluded the data referring to  
 260 items 1, 2, and 3 of the anatomical and functional evaluation, because they are not  
 261 directly related to the anatomy of the lingual fraenum and non-nutritive sucking  
 262 (NNS), not to be the object of study of this work.

263 The data from the protocol for lingual fraenum evaluation in infants were  
 264 analysed and the results from the anatomical and functional evaluation part I item 4  
 265 (which analysed the lingual fraenum thickness and fraenum attachment to the  
 266 sublingual aspect and the floor of the mouth), and the NS pattern (which comprised  
 267 the rhythm, coordination, nipple biting, and tongue snapping during sucking) were  
 268 aggregated.

269 There was no statistically significant difference (Table 1) when electrical  
 270 activity of the suprahyoid muscles was associated with the age of the infants ( $p =$   
 271  $0.368$ ) (ANOVA), gender ( $p = 0.136$ ), and feeding type ( $p = 0.689$ ) (T-test).

272 **Table 1- Association between the characteristics of infants (age in days at the examination,**  
 273 **gender, and feeding type) and muscular electrical activity (MEA).**

274

| Variables          | Type of test     | n                           | RMS    | $p^*$  |       |
|--------------------|------------------|-----------------------------|--------|--------|-------|
| Age at examination | Anova            | 235                         | 33,88% | 0,368  |       |
| Gender             | Student's t-test | Female                      | 122    | 32,82% | 0,136 |
|                    |                  | Male                        | 113    | 35,68% |       |
| Feeding type       | Student's t-test | Exclusive breastfeeding     | 176    | 33,97% | 0,689 |
|                    |                  | Non-exclusive breastfeeding | 59     | 34,86% |       |

ANOVA and Student's t-test;  $p^* \leq 0.05$

275 We observed (Table 2) a greater electrical activity in the muscle during  
 276 breastfeeding in the infants with their lingual fraenum attached to the middle third  
 277 and visible from the sublingual caruncle (40.69%), and lower electrical activity in  
 278 the muscle in the infants with their lingual fraenum attached to the apex of the  
 279 tongue and visible from the lower alveolar ridge (29.94%).

280 **Table 2 - Mean activity of the suprahyoid muscles expressed in RMS of infants based on the**  
 281 **lingual fraenulum attachment to the tongue and the floor of the mouth during breastfeeding.**  
 282

| Group | Location of lingual fraenulum attachment |                      | n   | RMS    | DP    |
|-------|------------------------------------------|----------------------|-----|--------|-------|
|       | Sublingual                               | Floor of the mouth   |     |        |       |
| 1     | middle third                             | sublingual caruncles | 53  | 40,69% | 15,22 |
| 2     | middle third                             | lower alveolar ridge | 35  | 31,13% | 11,69 |
| 3     | middle third/apex                        | sublingual caruncles | 28  | 36,91% | 12,94 |
| 4     | middle third/apex                        | lower alveolar ridge | 102 | 31,84% | 13,82 |
| 5     | apex                                     | lower alveolar ridge | 17  | 29,94% | 19,45 |

283 Student's t-test; SD - Standard Deviation; RMS - *root mean square*

284 A statistically significant difference was found when comparing the electrical  
 285 activity of the muscle and the location of the lingual fraenulum attachment on the  
 286 tongue and the floor of the mouth of infants, according to the division of the  
 287 groups. A significant difference was found between group 1 (middle  
 288 third/sublingual caruncles) and group 2 (middle third/lower alveolar ridge) ( $p =$   
 289  $0.002$ ), between group 1 (middle third / sublingual caruncles) and group 4 (middle  
 290 third and apex/lower alveolar ridge) ( $p = 0.001$ ), and between group 1 (middle  
 291 third/sublingual caruncles) and group 5 (apex/lower alveolar ridge) ( $p = 0.021$ )  
 292 (Table 3).

293 **Table 3 - Comparison of the electrical activity in the suprahyoid muscles between groups**  
 294 **expressed in RMS of infants during breastfeeding based on the lingual fraenulum attachment**  
 295 **to the tongue and floor of the mouth.**  
 296

| Group          | Location of lingual fraenulum attachment |                      | n   | RMS    | p*    |
|----------------|------------------------------------------|----------------------|-----|--------|-------|
|                | Sublingual                               | Floor of the mouth   |     |        |       |
| <b>1 and 2</b> | middle third                             | sublingual caruncles | 53  | 40,69% | 0,002 |
|                | middle third                             | lower alveolar ridge | 35  | 31,13% |       |
| <b>1 and 4</b> | middle third                             | sublingual caruncles | 53  | 40,69% | 0,001 |
|                | middle third / apex                      | lower alveolar ridge | 102 | 31,84% |       |
| <b>1 and 5</b> | middle third                             | sublingual caruncles | 53  | 40,69% | 0,021 |
|                | apex                                     | lower alveolar ridge | 17  | 29,94% |       |

297 Student's t-test;  $p^* \leq 0.050$ ; RMS - *root mean square*

298 Considering the statistically significant differences found in the association  
 299 between the groups, as described in Table 3, the electrical activity of the muscle  
 300 was compared to the location of the fraenulum attachment in the tongue and floor  
 301 of the mouth, lingual fraenulum thickness (thin or thick), and the pattern of  
 302 nutritive sucking (rhythm, coordination, bit the nipple, and tongue snapping). There  
 303 was a statistically significant difference, with a higher mean percentage of the  
 304 electrical activity of the suprahyoid muscle, during breastfeeding in infants with the  
 305 lingual fraenulum attached to the middle third/sublingual caruncles (group 1), who  
 306 had a thin lingual fraenulum ( $p = 0.002$ ), with several sucks and short pauses  
 307 during NS ( $p = 0.003$ ), coordination between sucking, swallowing and breathing

308 functions, without signs of stress ( $p = 0.001$ ), absence of bite in the nipple ( $p =$   
 309  $0.005$ ), and absence of tongue snapping ( $p = 0.001$ ) when compared to infants with  
 310 the lingual fraenum attached to the middle third/lower alveolar ridge (group 2)  
 311 (able 4).

312 **Table 4 - Comparison of the electrical activity in suprahyoid muscles between groups 1 and 2**  
 313 **expressed in RMS of infants according to thickness, lingual fraenum attached in the tongue**  
 314 **and floor of the mouth, and nutritive sucking pattern.**

315

| Variables         |                              | Lingual fraenum attachment/floor of the mouth | <i>n</i> | RMS    | <i>p</i> * |
|-------------------|------------------------------|-----------------------------------------------|----------|--------|------------|
| Fraenum Thickness | Thin                         | G1-MT / SC                                    | 47       | 41,15% | 0,002      |
|                   |                              | G2 - MT / IAC                                 | 35       | 31,12% |            |
|                   | Thick                        | G1-MT / SC                                    | 6        | 37,06% |            |
|                   |                              | G2 - MT / IAC                                 | 0        | 0,00%  |            |
| Rhythm            | Several sucks / short breaks | G1-MT / SC                                    | 46       | 41,72% | 0,003      |
|                   |                              | G2 - MT / IAC                                 | 32       | 31,68% |            |
|                   | Few sucks / long breaks      | G1-MT / SC                                    | 7        | 33,92% |            |
|                   |                              | G2 - MT / IAC                                 | 3        | 25,24% |            |
| Coordination      | Proper                       | G1-MT / SC                                    | 51       | 41,38% | 0,001      |
|                   |                              | G2 - MT / IAC                                 | 34       | 31,13% |            |
|                   | Inadequate                   | G1-MT / SC                                    | 2        | 23,08% |            |
|                   |                              | G2 - MT / IAC                                 | 1        | 31,01% |            |
| Bite the nipple   | Not                          | G1-MT / SC                                    | 48       | 41,77% | 0,005      |
|                   |                              | G2 - MT / IAC                                 | 26       | 31,85% |            |
|                   | Yes                          | G1-MT / SC                                    | 5        | 30,33% |            |
|                   |                              | G2 - MT / IAC                                 | 9        | 29,03% |            |
| Tongue snapping   | Not                          | G1-MT / SC                                    | 36       | 42,55% | 0,001      |
|                   |                              | G2 - MT / IAC                                 | 18       | 27,48% |            |
|                   | Yes                          | G1-MT / SC                                    | 17       | 36,75% |            |
|                   |                              | G2 - MT / IAC                                 | 17       | 34,98% |            |

Student's t-test;  $p^* \leq 0.050$ ; RMS - *root mean square*

Group 1- Middle third / sublingual caruncles ( $n = 53$ )

Group 2 - Middle third / lower alveolar ridge ( $n = 35$ )

316 A higher mean electrical activity of the suprahyoid muscles was observed during  
 317 nutritive sucking in infants with the lingual fraenum attached to the middle  
 318 third/sublingual caruncle (group 1), who had a thin lingual fraenum ( $p = 0.001$ ),  
 319 with coordination between the sucking ( $p = 0.003$ ), swallowing and breathing  
 320 functions, without signs of stress ( $p = 0.001$ ), absence of bite at the nipple ( $p =$   
 321  $0.001$ ), and absence of tongue snapping ( $p = 0.001$ ) when compared to infants with  
 322 the lingual fraenum attached to the middle third and apex/lower alveolar ridge  
 323 (group 4) (Table 5).

**Table 5 - Comparison of the electrical activity in the suprahyoid muscles between groups 1 and 4**  
**expressed in RMS of infants according to thickness, fraenum attachment to the tongue and floor**  
**of the mouth, and nutritive sucking pattern.**

| Variables         |                              | Lingual fraenum attachment/floor of the mouth | n  | RMS    | p*    |
|-------------------|------------------------------|-----------------------------------------------|----|--------|-------|
| Fraenum Thickness | Thin                         | G1 - MT / SC                                  | 47 | 41,15% | 0,001 |
|                   |                              | G4 - MTA / IAC                                | 94 | 31,57% |       |
|                   | Thick                        | G1 - MT / SC                                  | 6  | 37,06% | 0,8   |
|                   |                              | G4 - MTA / IAC                                | 8  | 35,02% |       |
| Rhythm            | Several sucks / short breaks | G1 - MT / SC                                  | 46 | 41,72% | 0,003 |
|                   |                              | G4 - MTA / IAC                                | 66 | 33,19% |       |
|                   | Few sucks / long breaks      | G1 - MT / SC                                  | 7  | 33,92% | 0,4   |
|                   |                              | G4 - MTA / IAC                                | 36 | 29,37% |       |
| Coordination      | Proper                       | G1 - MT / SC                                  | 51 | 41,38% | 0,001 |
|                   |                              | G4 - MTA / IAC                                | 91 | 32,71% |       |
|                   | Inadequate                   | G1 - MT / SC                                  | 2  | 23,08% | 0,86  |
|                   |                              | G4 - MTA / IAC                                | 11 | 24,68% |       |
| Bite the nipple   | Not                          | G1 - MT / SC                                  | 48 | 41,77% | 0,001 |
|                   |                              | G4 - MTA / IAC                                | 78 | 32,34% |       |
|                   | Yes                          | G1 - MT / SC                                  | 5  | 30,33% | 0,98  |
|                   |                              | G4 - MTA / IAC                                | 24 | 30,23% |       |
| Tongue snapping   | Not                          | G1 - MT / SC                                  | 36 | 42,55% | 0,001 |
|                   |                              | G4 - MTA / IAC                                | 34 | 29,30% |       |
|                   | Yes                          | G1 - MT / SC                                  | 17 | 36,75% | 0,34  |
|                   |                              | G4 - MTA / IAC                                | 68 | 33,12% |       |

Student's t-test;  $p^* \leq 0.050$ ; RMS - root mean square

Group 1 - Middle third / sublingual caruncles (n = 53)

Group 4 - Middle third and Apex / lower alveolar ridge (n = 102)

324

325

326

327

328

329

330

331

332

A statistically significant difference was observed with a higher mean percentage of the electrical activity of the suprahyoid muscles during breastfeeding in infants with the lingual fraenum attached to the middle third/sublingual caruncles (group 1); who had a thin lingual fraenum ( $p = 0.02$ ); a NS pattern with coordination between sucking, swallowing, and breathing functions; without signs of stress ( $p = 0.005$ ); absence of bite at the nipple ( $p = 0.03$ ); and absence of tongue snapping ( $p = 0.006$ ) when compared to infants with the lingual fraenum attached to the apex/lower alveolar ridge (group 5) (Table 6).

333 **Table 6 - Comparison of the electrical activity in the suprahyoid muscles between groups 1 and 5**

334 **expressed in RMS of the infants according to thickness, lingual fraenum attachment to the**

335 **tongue and floor of the mouth, and nutritive sucking pattern.**

| Variables         |                              | Lingual fraenum attachment/floor of the mouth | n  | RMS    | p*    |
|-------------------|------------------------------|-----------------------------------------------|----|--------|-------|
| Fraenum Thickness | Thin                         | G1 - MT / SC                                  | 47 | 41,15% | 0,02  |
|                   |                              | G5 - Á / IAC                                  | 17 | 29,94% |       |
|                   | Thick                        | G1 - MT / SC                                  | 6  | 37,06% | 0     |
|                   |                              | G5 - Á / IAC                                  | 0  | 0,00%  |       |
| Rhythm            | Several sucks / short breaks | G1 - MT / SC                                  | 46 | 41,72% | 0,08  |
|                   |                              | G5 - Á / IAC                                  | 10 | 31,18% |       |
|                   | Few sucks / long breaks      | G1 - MT / SC                                  | 7  | 33,92% | 0,44  |
|                   |                              | G5 - Á / IAC                                  | 7  | 28,16% |       |
| Coordination      | Proper                       | G1 - MT / SC                                  | 51 | 41,38% | 0,005 |
|                   |                              | G5 - Á / IAC                                  | 12 | 27,63% |       |

|                 |            |              |    |        |       |
|-----------------|------------|--------------|----|--------|-------|
|                 | Inadequate | G1 - MT / SC | 2  | 23,08% | 0,62  |
|                 |            | G5 - Á / IAC | 5  | 35,47% |       |
| Bite the nipple | Not        | G1 - MT / SC | 48 | 41,77% | 0,03  |
|                 |            | G5 - Á / IAC | 13 | 30,28% |       |
|                 | Yes        | G1 - MT / SC | 5  | 30,33% | 0,79  |
|                 |            | G5 - Á / IAC | 4  | 28,83% |       |
| Tongue snapping | Not        | G1 - MT / SC | 36 | 42,55% | 0,006 |
|                 |            | G5 - Á / IAC | 6  | 24,63% |       |
|                 | Yes        | G1 - MT / SC | 17 | 36,75% | 0,6   |
|                 |            | G5 - Á / IAC | 11 | 32,83% |       |

Student's t-test;  $p \leq 0.050$ ; RMS - *root mean square*

Group 1- Middle third / sublingual caruncles (n = 53)

Group 5 - Apex /lower alveolar ridge (n = 17)

336

337

## Discussion

338

339

340

341

342

343

344

345

346

347

348

349

350

351

352

353

354

355

356

357

358

359

360

361

362

The age group of 1 to 4 months analysed in the present study is the same as other studies that used electromyographic evaluation in infants [18-23,26]. Most of the infants were aged between 31 and 60 days, which favours the promotion of breastfeeding and an early diagnosis of the lingual fraenum in the population attended, preventing eventual difficulties in feeding and speech [10,12-15].

Most of the infants were exclusively breastfed. Of the 235 infants included, 57 were already using a bottle to complement their feeding. The main reasons reported by the mothers for the bottle complementation included the child was crying a lot, irritated, hungry, weak, not gaining weight, or the mother was producing insufficient breast milk. These data agree with the literature. A previous study showed that the main reasons for early weaning included the mothers' lack of knowledge about breastfeeding benefits, care and clinical management, and functional and anatomical problems related to the mothers and infants [32]. Another previous study identified some of the main difficulties in breastfeeding related to a lingual fraenum alteration, which included increased feeding time, low breast milk intake, and poor weight gain [11,14,15,33], favouring early weaning [11,14,15,33-35].

All the infants that participated in this study were referred from public maternity hospitals that are regulated by the Brazilian Unified Health System (Sistema Único de Saúde - SUS). Currently, in the municipality of Goiânia in the State of Goiás, four maternity hospitals are qualified by the Brazilian Ministry of Health, receive financial incentives, and are included in the Baby-Friendly Hospital Initiative programme [36]. This support may have favoured exclusive breastfeeding in the infants of this study, since the main objectives of this programme are protection, promotion, and support of breastfeeding [37]. A previous study



363 revealed [37,38] that infants born in maternities that do not participate in the Baby-  
364 Friendly Hospital Initiative were more likely to have early weaning.

365 In the anatomical and functional evaluation, we observed that 27.3% of the  
366 infants had their lingual fraenum covered by a mucosal curtain, which was  
367 visualized through a manoeuvre, and 9.3% had a thick lingual frenulum. These  
368 findings agree with a previous study [15] that evaluated 100 healthy, full-term, 30-  
369 day-old infants. The authors in that study found the incidence of a lingual  
370 fraenum covered by mucosal curtain to be 29%. Another study [39] performed  
371 with 1,084 healthy infants, found that 35% of these had posterior lingual fraenum  
372 and that this type of lingual fraenum did not interfere with breastfeeding. An  
373 experimental study [40], performed with 1,715 healthy infants, found the  
374 occurrence of posterior or submucosal lingual frenulum in 558 (32.54%) infants, as  
375 well as the efficiency of the maneuver used to visualize this lingual frenulum.  
376 There was a higher frequency (43.4%) of lingual fraenum attachment to the  
377 tongue between the middle third and the apex and visible from the lower alveolar  
378 ridge. These results agree with the literature: a retrospective study that analysed  
379 165 protocols for assessing the lingual fraenum of full-term babies aged between  
380 1 and 4 months that found a prevalence of 32.2% of the lingual fraenum attached  
381 between the middle third and the apex/ lower alveolar ridge [39]. Another previous  
382 longitudinal study, which evaluated the anatomical characteristics of the lingual  
383 fraenum of 71 full-term infants, found that 27 (38%) had their lingual frenulum  
384 attached between the middle third and the apex at the 1<sup>st</sup>, 6<sup>th</sup>, and 12<sup>th</sup> month of life,  
385 and 42 (59.1%) infants had their lingual frenulum attached in the lower alveolar  
386 ridge [15].

387 In the present study, there was no significant difference between the electrical  
388 activity of the suprahyoid muscles during nutritional sucking and the infants' age in  
389 days ( $p = 0.368$ ), as opposed to the literature findings. A previous study [22] that  
390 investigated the development of sucking of full-term infants through  
391 electromyography during breastfeeding found that the activity of the suprahyoid  
392 muscles was higher with increasing age and that the activity of this muscle in the  
393 active movements of the tongue and mandible lowering favours an increase of  
394 sucking force in breastfeeding. Other previous studies that analysed the  
395 submandibular muscles in breastfeeding through ultrasonography found that the  
396 sucking pattern does not differ in infants aged between 1 to 4 months, indicating an  
397 early development of the coordination between sucking, swallowing, and breathing  
398 and that this may vary depending on the milk flow at the time of ejection and the  
399 adaptive capacity of infants during breastfeeding [8,9]



400                   There was no significant difference between electrical activity of the muscle  
401 during sucking and gender ( $p = 0.136$ ). Several previous studies [22,23,26] that  
402 analysed the activity of orofacial muscles of full-term infants and premature infants  
403 during different feeding methods did not find a correlation between the electrical  
404 activity of the studied muscles and gender. Although 59 (25.1%) of the infants  
405 analysed in the present study used complementary feeding with a bottle at home,  
406 the results did not have a significant difference when compared to feeding type ( $p$   
407  $= 0.689$ ). This result may be because all electromyography tests were performed  
408 during sucking of the breast. It should be emphasised that the fact that mothers  
409 supplement the feeding of their babies at night with a bottle did not influence the  
410 electrical activity of the muscle. Some previous studies indicated that the use of  
411 bottle feeding favours the participation of the mental and buccinator muscles and  
412 causes a hypofunction of the masseter [18-20,23], temporal, pterygoid, tongue, and  
413 lip muscles [18].

414                   In the present study, we found lower electrical activity of the suprahyoid  
415 muscles during sucking of the breast in infants with their fraenum attached of the  
416 middle third of the tongue, between the middle third and the apex, and to the apex  
417 and visible from the lower alveolar ridge, regardless of age. These results indicate  
418 that the attachment of the lingual fraenum on the mouth floor visible from the  
419 lower alveolar ridge, appears to interfere more with the tongue forward when  
420 compared to the fraenum attached of the middle third of the tongue and middle  
421 third apex.

422                   These results provide important data for the differential diagnosis of the lingual  
423 fraenum, because they identify anatomical characteristics that may reduce muscle  
424 activity due to the restriction of tongue-tip movement during sucking in infants that  
425 could impair breastfeeding. A previous study [6] that assessed infants with  
426 persistent difficulties in breastfeeding through submandibular ultrasonography  
427 during breastfeeding, before and after a frenulotomy, found abnormal tongue  
428 movements and ineffective removal of breast milk, followed by an improvement in  
429 milk transfer and tongue movement during breastfeeding after the tongue-clearing  
430 procedure.

431                   We also observed a greater electric activity of the muscle in infants with a thin  
432 lingual fraenum and with the frenulum attachment to the middle third of the  
433 tongue and visible from the sublingual caruncles, which had a sucking rhythm  
434 comprised of several sucks and short pauses, balanced coordination between food  
435 efficiency and sucking, swallowing and breathing functions, showing no signs of  
436 stress, and absence of bite of the nipple and tongue snapping, with a statistically

437 significant difference when compared to the muscular electrical activity of infants  
438 with the fraenum attached of the middle third of the tongue, between the middle  
439 third and the apex, and to the apex and visible from the lower alveolar ridge.  
440 A previous study [14] that analysed 109 full-term infants, and referred to a surgical  
441 procedure for tongue release (frenotomy), 14 of the infants who presented altered  
442 lingual fraenum, showed a statistically significant relationship between  
443 anatomical characteristics of the lingual fraenum and nutritive sucking, with  
444 improvement of the sucking pattern in breastfeeding after the frenotomy. Another  
445 previous study [41] identified that infants with an altered fraenum were more  
446 likely to have difficulty sucking. Furthermore, a previous longitudinal study [15],  
447 which analysed the anatomical characteristics of the lingual fraenum throughout  
448 the first year of the infant, observed that there is no change in its thickness,  
449 attachment of the tongue, and the floor of the mouth. Thus, early identification of  
450 the alteration is fundamental to intervention of the frenulotomy.

451 Previous studies have shown that the tongue actively participates in sucking and  
452 is essential for proper removal of breast milk [4,6-9]. The nipple is compressed  
453 from the tip to the base when the tongue is high and, when it lowers, the nipple  
454 expands by approaching the hard palate with the soft palate and increases in  
455 diameter causing a vacuum and allowing the milk to flow into the intraoral space  
456 [6-9]. Alterations of the lingual fraenum may limit its motility [6,10-15], making  
457 it difficult the inadequate catching and can lead to changes in the sucking function,  
458 especially in the dynamic of sucking/removal of milk. The main problems  
459 identified in cases of altered lingual fraenum in relation to breastfeeding in the  
460 mother's womb are difficulties in catching, nipple pain and cracking, prolonged  
461 feeding time, reduced milk intake by the infant, loss of weight [11,14,33-35],  
462 dehydration, and growth deficiency [33-35]. Such changes may hinder the  
463 continuity of breastfeeding [10,11,14,33-35] with consequences for the infant's  
464 health and, later on, the development of chewing and speech [10,13-15].

465 No studies associating electrical activity of the suprahyoid muscles and the  
466 lingual fraenum of infants during feeding were found in literature. A previous  
467 study [5,20,22,24] that analysed the suprahyoid muscles during feeding using  
468 surface electromyography differed from the present study as to the objectives,  
469 infants' age, sample size, feeding types and, because they did not associate the  
470 anatomical characteristics of the lingual fraenum, made it impossible to compare  
471 the findings.

472 Surface electromyography has been shown to be effective in the early diagnosis  
473 of the limitations of tongue movements caused by the lingual fraenum, whose

474 attachment location, both on the tongue and the floor of the mouth, may raise  
475 doubts about the reduction of tongue mobility. This technique allows for the  
476 identification of possible oral motor dysfunctions, enables direct therapeutic  
477 interventions and early intervention, and consequently prevents feeding and  
478 communication alterations.

479 Among the main limitations of our study are the reduced schedules for the  
480 examination of the infants due to technical problems related to the regulation of the  
481 patients by the SUS, as well as the non-attendance of scheduled infants due to  
482 health problems and the public transportation strike.

483 Further studies investigating the the electrical activity of the suprahyoid muscles  
484 through surface electromyography after surgery to release the lingual fraenum  
485 may contribute to a better understanding of the impact of ankyloglossia on tongue  
486 movements during breastfeeding.

## 487 **Conclusion**

488 A greater electrical activity of the muscle was observed during sucking of the  
489 maternal breast in full-term infants when the lingual fraenum was attached of the  
490 middle third of the tongue and visible from the sublingual caruncle. Lower  
491 electrical activity of the suprahyoid muscles during sucking of the maternal breast  
492 was observed in full-term infants with the lingual fraenum attached at the apex of  
493 the tongue and visible from the lower alveolar ridge.

494 We also observed a greater electric activity of the muscle in infants with a thin  
495 lingual fraenum and a rhythm comprised of several sucks and short pauses,  
496 adequate and balanced coordination between the feeding efficiency and the  
497 sucking, swallowing and breathing functions, without signs of stress, and absence  
498 of “bite” of the nipple and tongue snapping.

## 499 **Supporting information**

500 Fig 1 - Electromyographic evaluation. Electrodes attached to bone (forehead)  
501 and submandibular (supra-hyoid muscles) region during sucking on breastfeeding

## 502 **Authors' contributions**

503 ECLF: conceptualization, data curation, formal analysis, writing original draft,  
504 writing review and editing. LACV: formal analysis, writing review and editing.  
505 IMFG: formal analysis, writing review and editing. RLCM: formal analysis, writing  
506 review and editing. CBS: conceptualization, data curation, formal analysis, writing  
507 original draft, writing review and editing. MAB: conceptualization, data curation,

508 formal analysis, writing original draft, writing review and editing. All authors  
509 contributed to the revision and agreed upon the final article.

## 510 **Acknowledgement**

511 We thank the employees of the Reference Center for Hearing Health of the  
512 Pontifical Catholic University of Goiás, and the mothers and newborns who  
513 participated in the study.

514 This study was funded by the Foundation for Research Support of the State of  
515 Goiás (Fundação de Amparo à Pesquisa do Estado de Goiás - FAPEG process:  
516 2016/10267000710).

## 517 **References**

- 518 **1.** Horta BL, Victora CG. Long-term effects of breastfeeding. A systematic review.  
519 Geneva: World Health Organization; 2013.
- 520 **2.** Ogbo FA, Agho K, Ogeleka P, Woolfenden S, Page A, Eastwood J, et al. Infant  
521 feeding practices and diarrhoea in sub-Saharan African countries with high  
522 diarrhoea mortality. PLoS ONE. 2017;12(2): e0171792.  
523 <https://doi.org/10.1371/journal.pone.0171792>
- 524 **3.** Limme M. The need of efficient chewing function in young children as prevention  
525 of dental malposition and malocclusion. Arch Pediatr. 2010;17(Suppl 5): S213-  
526 S219.
- 527 **4.** Casagrande L, Ferreira FV, Hahn D, Unfer T, Praetzel JR. Aleitamento natural e  
528 artificial e o desenvolvimento do sistema Estomatognático. Rev Fac Odontol Porto  
529 Alegre. 2008;49(2): 11-17.
- 530 **5.** Raposo RD, Silva HD. Proposta de um protocolo de avaliação da atividade elétrica  
531 dos músculos masseter e supra-hióideos em recém-nascidos pré-termo durante a  
532 alimentação. Rev CEFAC. 2013;15: 803-814.
- 533 **6.** Geddes DT, Langton DB, Gollow I, Jacobs LA, Hartmann PE, Simmer K.  
534 Frenulotomy for breastfeeding infants with ankyloglossia: effect on milk removal  
535 and sucking mechanism as imaged by ultrasound. Pediatrics. 2008;122(1): e188-  
536 e194.
- 537 **7.** Geddes DT, Sakalidis VS, Hepworth AR, McClellan HL, Kent JC, Lai CT, et al.  
538 Tongue movement and intra-oral vacuum of term infants during breastfeeding and  
539 feeding from an experimental teat that released milk under vacuum only. Early  
540 Hum Dev. 2012;Jun88(6): 443-449.

- 541                   **8.** Sakalidis VS, Kent JC, Garbin CP, Hepworth AR, Hartmann PE, Geddes DT.  
542                   Longitudinal changes in suck-swallow breathe, oxygen saturation, and heart rate  
543                   patterns in term breastfeeding infants. *J Hum Lact.* 2013;29(2): 236-245.
- 544                   **9.** Geddes DT, Sakalidis VS. Breastfeeding: how do they do it? Infant sucking,  
545                   swallowing and breathing. *Infant.* 2015;11(5): 146-150.
- 546                   **10.** Melo NSFO, Lima AAS, Fernandes A, Silva RPGVC. Anquiloglossia: relato de  
547                   caso. *Rev Soc Bras Odontol.* 2011;8(1): 102-107.
- 548                   **11.** Knox I. Tongue tie and frenotomy in the breastfeeding newborn. *Neo Reviews.*  
549                   2010;11(9): 513-519.
- 550                   **12.** Marchesan IQ. Protocolo de Avaliação do Frênulo da Língua. *Rev CEFAC.*  
551                   2010;12(6): 977-978.
- 552                   **13.** Martinelli RL, Marchesan IQ, Berretin-Felix G. Protocolo de avaliação do frênulo  
553                   lingual para bebês: relação entre aspectos anatômicos e funcionais. *Rev CEFAC.*  
554                   2013;15(3): 599-610.
- 555                   **14.** Martinelli RLC, Marchesan IQ, Gusmão RJ, Honório HM, Berretin-Felix G. The  
556                   effects of frenotomy on breastfeeding. *J Appl Oral Sci.* [Internet]. 2015 Apr [cited  
557                   2018 Sep 13];23(2):153-7. Available from:  
558                   [http://www.scielo.br/scielo.php?script=sci\\_arttext&pid=S1678-](http://www.scielo.br/scielo.php?script=sci_arttext&pid=S1678-77572015000200007&lng=en)  
559                   [77572015000200007&lng=en. http://dx.doi.org/10.1590/1678-775720140339](http://dx.doi.org/10.1590/1678-775720140339)
- 560                   **15.** Martinelli RLC, Marchesan IQ, Berretin-Felix G. Estudo longitudinal das  
561                   características anatômicas do frênulo lingual comparado com as afirmações da  
562                   literatura. *Rev CEFAC.* 2014;16(4): 1202-1207.
- 563                   **16.** Suvinen TI, Malmberg J, Forster C, Kempainen P. Postural and dynamic masseter  
564                   and anterior temporalis muscle EMG repeatability in serial assessments. *J Oral*  
565                   *Rehabil.* 2009;36: 814-820.
- 566                   **17.** Moraes KJR, Cunha RA, Lins OG, Cunha DA, Silva HJ. Eletromiografia de  
567                   Superfície: padronização da técnica. *Neurobiologia.* 2010;73(3): 151-158.
- 568                   **18.** Gomes CF, Trezza EM, Murade EC, Padovani CR. Surface electromyography of  
569                   facial muscles during natural and artificial feeding of infants. *J Pediatr.* 2006;82:  
570                   103-109.
- 571                   **19.** Inoue N, Sakashita R, Kamegai T. Reduction of masseter muscle activity in bottle-  
572                   fed babies. *Early Hum Dev.* 1995;42: 185–193.
- 573                   **20.** Tamura Y, Horikawa Y, Yoshida S. Co-ordination of tongue movements and peri-  
574                   oral muscle activities during nutritive sucking. *Dev Med Child Neurol.* 1996;38:  
575                   503-510.

- 576                   **21.** Sakashita R, Kamegai T, Inoue N. Masseter muscle activity in bottle feeding with  
577                   the chewing type bottle teat: evidence from electromyographs. *Early Hum Dev.*  
578                   1996;45: 83-92.
- 579                   **22.** Tamura Y, Matsushita S, Shinoda K, Yoshida S. Developmental of perioral muscle  
580                   activity during suckling in infants: a cross-sectional and follow-up study. *Dev Med*  
581                   *Child Neurol.* 1998;40: 344-348.
- 582                   **23.** Gomes CF, Da Costa Gois MLC, Oliveira BC, Thomson Z, Cardoso JR. *Indian J*  
583                   *Pediatr.* 2013;sep81: 755.
- 584                   **24.** Martins CD, Furlan RMMM, Motta AR, Viana MCFB. Electromyography of  
585                   muscles involved in feeding premature infants. *CoDAS.* 2015;27(4): 372-377.
- 586                   **25.** Nyqvist KH, Ewald U. Surface electromyography of facial muscles during natural  
587                   and artificial feeding of infants: identification of differences between breast-, cup-  
588                   and bottle- feeding. *J Pediatr.* 2006;82: 858-6.
- 589                   **26.** França ECL, Sousa CB, Aragão LC, Costa LR. Electromyographic analysis of  
590                   masseter muscle in newborns during suction in breast, bottle or cup feeding. *BMC*  
591                   *Pregnancy and Childbirth (Online).* 2014;14: 154.
- 592                   **27.** Matinelli RLC. Validação do protocolo de avaliação do frênulo da língua em bebês  
593                   [tese]. Bauru: Faculdade de Odontologia de Bauru, Universidade de São Paulo;  
594                   2015.
- 595                   **28.** De Luca CJ, Adam A, Wotiz R, Gilmore LD, Nawab SH. Decomposition of  
596                   surface EMG signals. *J Neurophysiol.* 2006;96: 1646–1657.
- 597                   **29.** Pernambuco LA, Silva HJ, Nascimento GKBO, Silva EGF, Balata PMM, Santos  
598                   VS, et al. Electrical activity of the masseter during swallowing after total  
599                   laryngectomy. *Braz J Otorhinolaryngol.* 2011;77(5): 645-650.
- 600                   **30.** SENIAM (2013). "SENIAM: European Recommendations for Surface  
601                   Electromyography." [Acesso em: 13 fev 2016]; Disponível em:  
602                   <http://www.seniam.org>.
- 603                   **31.** Ball N, Scurr J. An assessment of the reliability and standardisation of test, used to  
604                   elicit reference muscular actions for electromyographical normalization. *J*  
605                   *Electromyogr Kinesiol.* 2010;20: 81-88.
- 606                   **32.** Oliveira CS, Locca FA, Carrijo MLR, Garcia R AT M. Amamentação e as  
607                   intercorrências que contribuem para o desmame precoce. *Rev Gaúcha Enferm.*  
608                   2015;36: 16-23.
- 609                   **33.** Francis DO, Chinnadurai S, Morad A, Epstein RA, Kohanim S, Krishnaswami S,  
610                   et al. Treatments for ankyloglossia and ankyloglossia with concomitant lip-tie.  
611                   Rockville (MD): Agency for Healthcare Research and Quality, 2016.

- 612                   **34.** Kent JC, Ashton E, Hardwick CM, Rowan MK, Chia ES, Fairclough KA, et al.  
613                   Nipple pain in breastfeeding mothers: incidence, causes and treatments. *Int J*  
614                   *Environ Res Public Health*. 2015;12(10): 12247-12263.
- 615                   **35.** O'Shea JE, Foster JP, O'Donnell CP, Breathnach D, Jacobs SE, Todd DA, et al.  
616                   Frenotomy for tongue-tie in newborn infants. *Cochrane Database Syst Rev*.  
617                   2017;11(3): CD011065.
- 618                   **36.** Lista dos Hospitais Amigo da Criança. Brasil, 2010. [Capturado em 20 de  
619                   novembro de 2014]. Disponível em  
620                   [http://www.unicef.org/brazil/pt/br\\_listaIHAC2010.pdf](http://www.unicef.org/brazil/pt/br_listaIHAC2010.pdf)
- 621                   **37.** Sampaio PF, Moraes CL, Reichenheim ME, Oliveira ASD, Lobato G. Nascer em  
622                   Hospital Amigo da Criança no Rio de Janeiro, Brasil: um fator de proteção ao  
623                   aleitamento materno? *Cad Saúde Pública*, Rio de Janeiro. 2011;27(7): 1349-1361.
- 624                   **38.** Caldeira DA, Gonçalves E. Avaliação de impacto da implantação da Iniciativa a  
625                   Hospital Amigo da Criança. *Archivos de Pediatría del Uruguay*. 2009;80: 2.
- 626                   **39.** Martinelli RLC, Marchesan IQ, Berretin-Felix G: Posterior lingual frenulum and  
627                   breastfeeding. *Int J Orofacial Myology* 2016, 20:49-54.
- 628                   **40.** Martinelli RLC, Marchesan IQ, Berretin-Felix G: Frênulo lingual posterior em  
629                   bebês: ocorrência e manobra para visualização. *Rev CEFAC* 2018, 20(4):478-483.
- 630                   **41.** Marcione ESS, Coelho FG, Souza CB, França ECL. Classificação anatômica do  
631                   frênulo lingual de bebês. *Rev CEFAC*. 2016;18(5): 1042-1049.



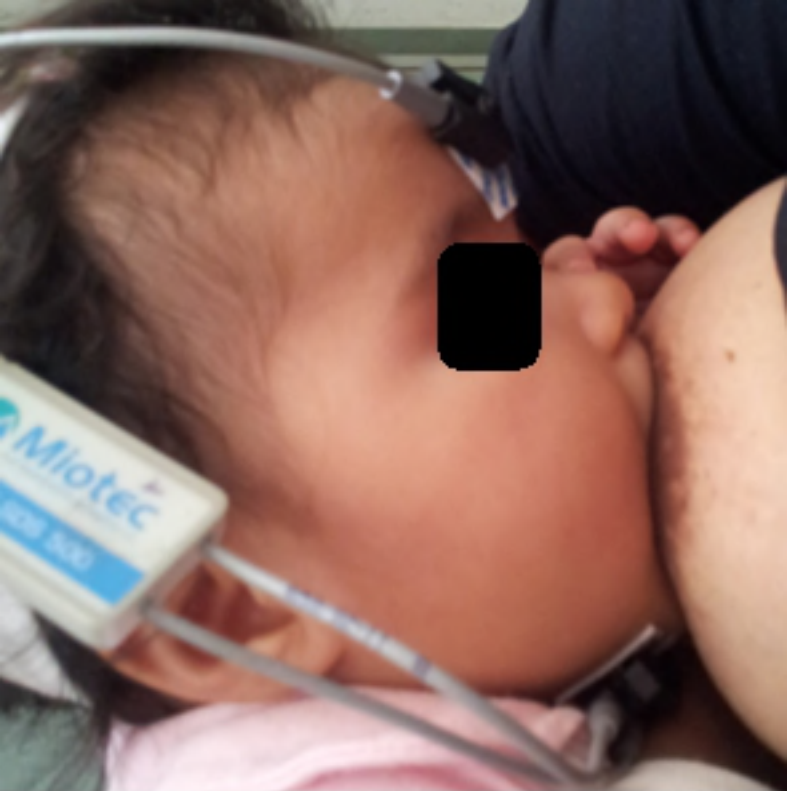

Figure 1
